# Supplementary material
Source: publisher site journal article supplement (https://www.dovepress.com/article/427076)
Supplement: Supplementary file 1 [file get_supplementary_file.php]

# Supplementary material 1: Formative DOPS Assessment Form Diagnostic Upper GI Endoscopy

Trainee

Faculty

Date (DD/MM/YYYY)

## Scale and Criteria Key

- 4 Highly skilled performance
- 3 Competent and safe throughout procedure, no uncorrected errors
- 2 Some standards not yet met, aspects to be improved, some errors uncorrected
- 1 Accepted standards not yet met, frequent errors uncorrected
- n/a Not applicable

| Criteria                                                                                                                                                                                                                                                                                                                                                                                                                                                                                                                     | Score | Comments |
|------------------------------------------------------------------------------------------------------------------------------------------------------------------------------------------------------------------------------------------------------------------------------------------------------------------------------------------------------------------------------------------------------------------------------------------------------------------------------------------------------------------------------|-------|----------|
| <b>Assessment, consent, communication</b><br>Obtains informed consent using a structured approach <ul style="list-style-type: none"> <li>○ Satisfactory procedural information</li> <li>○ Risk and complications explained</li> <li>○ Sedation</li> <li>○ Opportunity for questions</li> </ul> Demonstrates respect for patient's views and dignity during the procedure<br>Communicates clearly with patient, including outcome of procedure with appropriate management and follow up plan. Full endoscopy report.         |       |          |
| <b>Safety and sedation</b><br>Safe and secure IV access<br>Gives appropriate dose of analgesia and sedation and ensures adequate oxygenation and monitoring of patient<br>Demonstrates good communication with the nursing staff.                                                                                                                                                                                                                                                                                            |       |          |
| <b>Endoscopic skills during insertion and procedure</b><br>Checks endoscope function before intubation<br>Intubates the oesophagus under direct vision<br>Maintains clear luminal view<br>Demonstrates awareness of patient's consciousness and comfort during the procedure and takes appropriate actions<br>Uses distension, suction and lens washing appropriately<br>Passes the scope into the second part of the duodenum<br>Uses retroflexion to visualise fundus and cardia<br>Completes procedure in reasonable time |       |          |
| <b>Diagnostic and therapeutic ability</b><br>Adequate mucosal visualisation<br>Recognises and notes the position of the gastro-oesophageal junction, and is appropriately orientated within the stomach and duodenum<br>Accurate identification and management of pathology<br>Uses diathermy and therapeutic techniques appropriately and safely<br>High quality images recorded<br>Recognises and manages complications appropriately                                                                                      |       |          |

## Case Difficulty

| Extremely easy | Fairly easy | Average | Fairly difficult | Very challenging |
|----------------|-------------|---------|------------------|------------------|
| 1              | 2           | 3       | 4                | 5                |

## Trainee comments

---



---

# Supplementary material 2: Formative DOPS Assessment Form Colonoscopy

Trainee

Faculty

Date (DD/MM/YYYY)

### Scale and Criteria Key

- 4 Highly skilled performance
- 3 Competent and safe throughout procedure, no uncorrected errors
- 2 Some standards not yet met, aspects to be improved, some errors uncorrected
- 1 Accepted standards not yet met, frequent errors uncorrected
- n/a Not applicable

| Criteria                                                                                                                                                                                                                                                                                                                                                                                                                                                                                                                                                                            | Score | Comments |
|-------------------------------------------------------------------------------------------------------------------------------------------------------------------------------------------------------------------------------------------------------------------------------------------------------------------------------------------------------------------------------------------------------------------------------------------------------------------------------------------------------------------------------------------------------------------------------------|-------|----------|
| <b>Assessment, consent, communication</b><br>Obtains informed consent using a structured approach <ul style="list-style-type: none"> <li>○ Satisfactory procedural information</li> <li>○ Risk and complications explained</li> <li>○ Co-morbidity</li> <li>○ Sedation</li> <li>○ Opportunity for questions</li> </ul> Demonstrates respect for patient's views and dignity during the procedure<br>Communicates clearly with patient, including outcome of procedure with appropriate management and follow up plan. Full endoscopy report.                                        |       |          |
| <b>Safety and sedation</b><br>Safe and secure IV access<br>Gives appropriate dose of analgesia and sedation and ensures adequate oxygenation and monitoring of patient<br>Demonstrates good communication with the nursing staff, including dosages and vital signs                                                                                                                                                                                                                                                                                                                 |       |          |
| <b>Endoscopic skills during insertion and procedure</b><br>Checks endoscope function before intubation<br>Performs PR<br>Maintains luminal view / inserts in luminal direction<br>Demonstrates awareness of patient's consciousness and pain during the procedure and takes appropriate action<br>Uses torque steering and control knobs appropriately<br>Uses distension, suction and lens washing appropriately<br>Recognises and logically resolves loop formation<br>Uses position change and abdominal pressure to aid luminal views<br>Completes procedure in reasonable time |       |          |
| <b>Diagnostic and therapeutic ability (Polypectomy, sclerotherapy)</b><br>Adequate mucosal visualisation<br>Recognises caecal/desc. colon landmarks or incomplete examination<br>Accurate identification and management of pathology<br>Uses diathermy and therapeutic techniques appropriately and safely<br>Recognises and manages complications appropriately                                                                                                                                                                                                                    |       |          |

### Case Difficulty

| Extremely easy | Fairly easy | Average | Fairly difficult | Very challenging |
|----------------|-------------|---------|------------------|------------------|
| 1              | 2           | 3       | 4                | 5                |

### Trainee comments

---



---

Supplementary material 3:

## **GAGES - UPPER GI ENDOSCOPY SCORESHEET**

**GLOBAL ASSessment of GASTROINTESTINAL ENDOSCOPIC SKILLS**

### **INTUBATION OF THE ESOPHAGUS**

**SCORE**

Reflects patient management, understanding of anatomy and sedation

5 Able to independently (successfully) intubate esophagus without patient discomfort

4

3 Requires detailed prompting and cues

2

1 Unable to properly intubate requiring take over

### **SCOPE NAVIGATION**

**SCORE**

Reflects navigation of the GI tract using tip deflection, advancement/withdrawal and torque

5 Expertly able to manipulated the scope in the upper GI tract autonomously.

4

3 Requires verbal guidance to completely navigate the upper GI tract

2

1 Not able to achieve goals despite detailed verbal cues, requiring take over

### **ABILITY TO KEEP A CLEAR ENDOSCOPIC FIELD**

**SCORE**

Utilization of insufflation, suction and/or irrigation to maximize mucosal evaluation

5 Uses insufflation, suction, and irrigation optimally to maintain clear view of endoscopic field

4

3 Requires moderate prompting to maintain clear view

2

1 Inability to maintain view despite extensive verbal cues

### **INSTRUMENTATION (if applicable; leave blank if not applicable)**

**SCORE**

Random biopsy: targeting is assessed by asking the endoscopist to take another biopsy from the identical site. Targeted instrumentation: evaluation is based on ability to direct the instrument to the target.

5 Expertly directs instrument to desired target

4

3 Requires some guidance and/or multiple attempts to direct instrument to target

2

1 Unable to direct instrument to target despite coaching

### **QUALITY OF EXAMINATION**

**SCORE**

Reflects attention to patient comfort, efficiency, and completeness of mucosal evaluation

5 Expertly completes the exam efficiently and comfortably

4

3 Requires moderate assistance to accomplish a complete and comfortable exam

2

1 Could not perform a satisfactory exam despite verbal and manual assistance requiring takeover of the procedure

Supplementary material 4:

## **GAGES - COLONOSCOPY SCORESHEET**

### **GLOBAL ASSESSMENT OF GASTROINTESTINAL ENDOSCOPIC SKILLS**

#### **SCOPE NAVIGATION**

**SCORE**

Reflects navigation of the GI tract using tip deflection, advancement/withdrawal and torque

- 5 Expertly able to manipulate the scope in the GI tract autonomously
- 4
- 3 Requires verbal guidance to completely navigate the lower GI tract
- 2
- 1 Not able to achieve goals despite detailed verbal guidance requiring takeover

#### **USE OF STRATEGIES**

**SCORE**

Examines use of patient positions, abdominal pressure, insufflation, suction and loop reduction to comfortably complete the procedure

- 5 Expert use of appropriate strategies for advancement of the scope while optimizing patient comfort
- 4
- 3 Use of some strategies appropriately, but requires moderate verbal guidance
- 2
- 1 Unable to utilize appropriate strategies for scope advancement despite verbal assistance

#### **ABILITY TO KEEP A CLEAR ENDOSCOPIC FIELD**

**SCORE**

Utilization of insufflation, suction and/or irrigation to maximize mucosal evaluation

- 5 Used insufflation, suction, and irrigation optimally to maintain clear view of endoscopic field
- 4
- 3 Requires moderate prompting to maintain clear view
- 2
- 1 Inability to maintain view despite extensive verbal cues

#### **INSTRUMENTATION (if applicable; leave blank if not applicable)**

**SCORE**

Random biopsy: targeting is assessed by asking the endoscopist to take another biopsy from the identical site. Targeted instrumentation: evaluation is based on ability to direct the instrument to the target.

- 5 Expertly directs instrument to desired target
- 4
- 3 Requires some guidance and/or multiple attempts to direct instrument to target
- 2
- 1 Unable to direct instrument to target despite coaching

#### **QUALITY OF EXAMINATION**

**SCORE**

Reflects attention to patient comfort, efficiency, and completeness of mucosal evaluation

- 5 Expertly completes the exam efficiently and comfortably
- 4
- 3 Requires moderate assistance to accomplish a complete and comfortable exam
- 2
- 1 Could not perform a satisfactory exam despite verbal and manual assistance requiring takeover of the procedure

## **Supplementary material 5: Prompt questions for Facilitator in Focused Group Discussion**

Experience on the ease of use the four assessment tools.

- Please describe your experience with using the different endoscopic skill assessment tools in a gastroenterology residency program
- In your opinion rate each of the tools from the easiest to use and to the most difficult to use.
- What was difficult to use about the tool you identified?

Ease of interpretation about the four assessment tools.

- Where there any ambiguous items/ items in the tools? If so which one(s)?
- Was the language used in the assessment tools easy to understand?
- In your opinion there any item/ task in any of the assessment forms that could have been misinterpreted?

Resources required in the resident assessment processes.

- Were the resources provided (material, time, space, personnel) adequate for carrying out the assessment?
- In your opinion, is there anything that can be provided that would help the assessment process?
